# Supplementary material for: 2D elastic fluorinated donor–acceptor type π-conjugated molecular crystals and their optical crystal–polymer hybrid films
Source: Royal Society of Chemistry journal article supplement (doi:10.1039/d5tc00790a), 2025-01-01
Supplement: d5tc00790a1.pdf [file d5tc00790a1.pdf]

## 2D Elastic fluorinated donor–accepter type $\pi$ -conjugated molecular crystals and its optical crystal-polymer hybrid film

Keigo Yano,<sup>a</sup> Takumi Matsuo,<sup>\*a,b</sup> and Shotaro Hayashi<sup>\*a,b</sup>

School of Engineering Science, Kochi University of Technology, Kami, Kochi 782-8502, Japan.

FOREST Center, Research Institute, Kochi University of Technology, Kami, Kochi 782-8502, Japan.

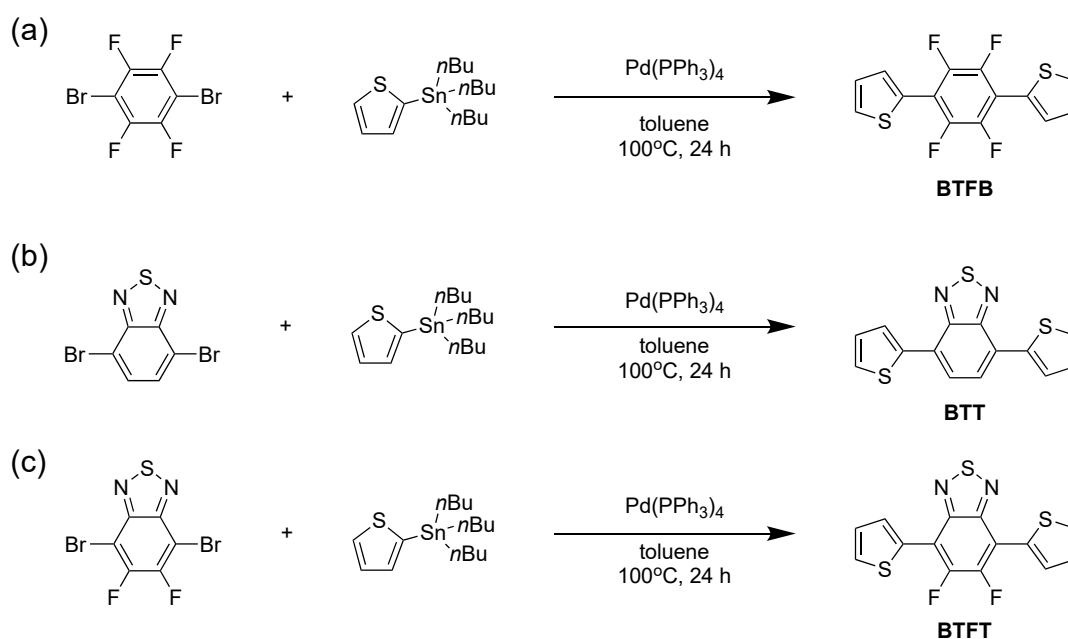

**Figure S1.** Synthetic scheme of (a) **BTFB**, (b) **BTT**, and (c) **BTFT**.

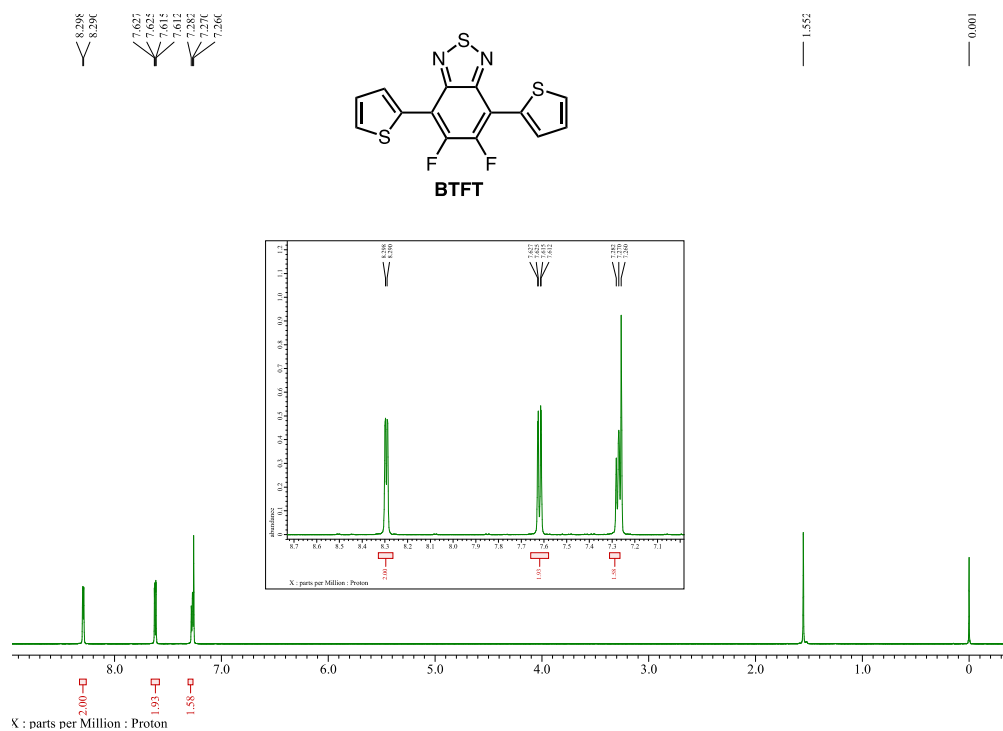

**Figure S2.** <sup>1</sup>H NMR spectrum of BTFT in CDCl<sub>3</sub>.

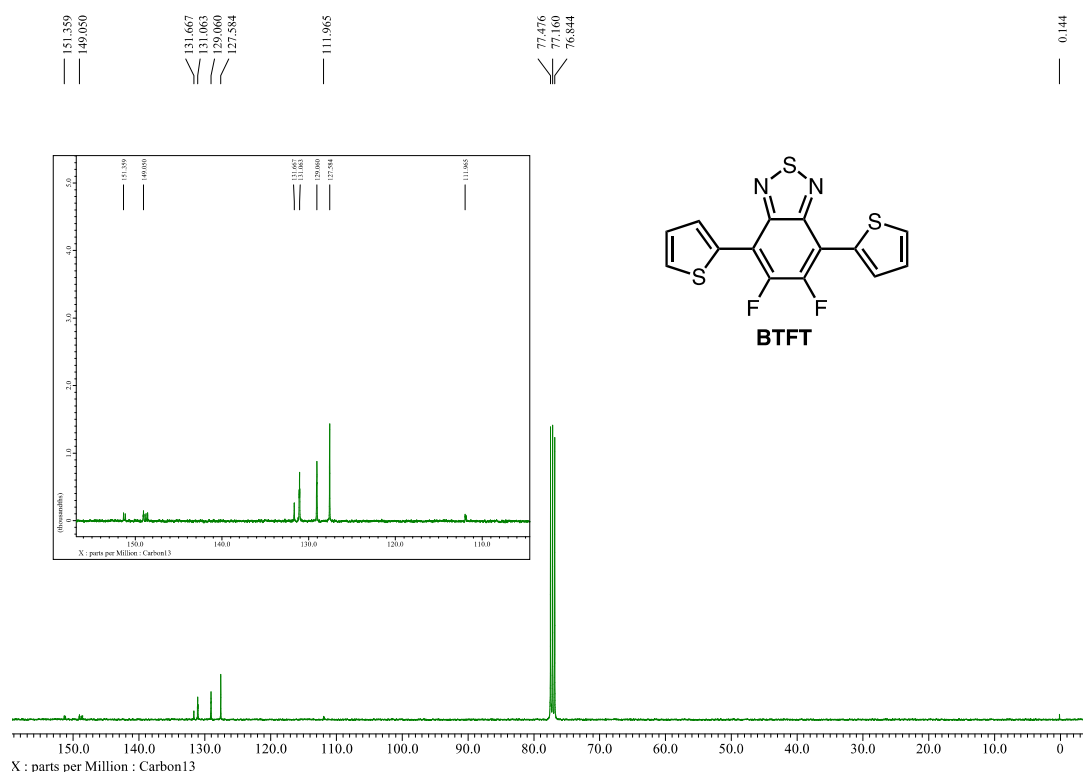

**Figure S3.** <sup>13</sup>C NMR spectrum of BTFT in CDCl<sub>3</sub>.

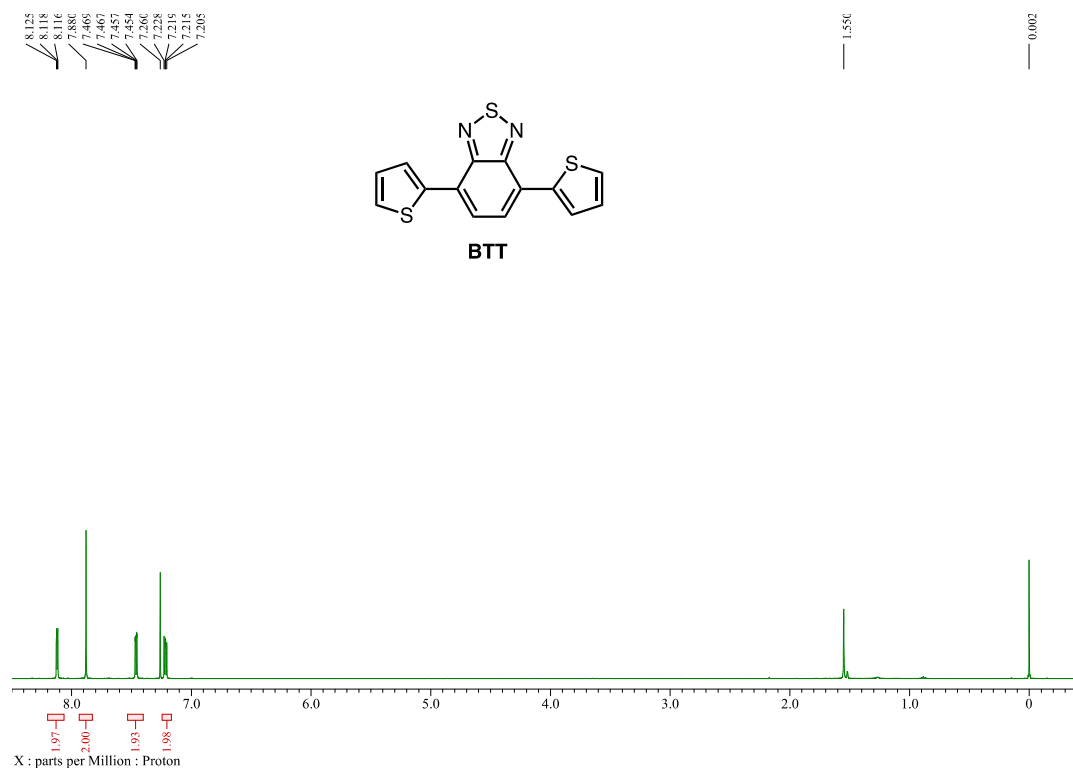

**Figure S4.** <sup>1</sup>H NMR spectrum of BTT in CDCl<sub>3</sub>.

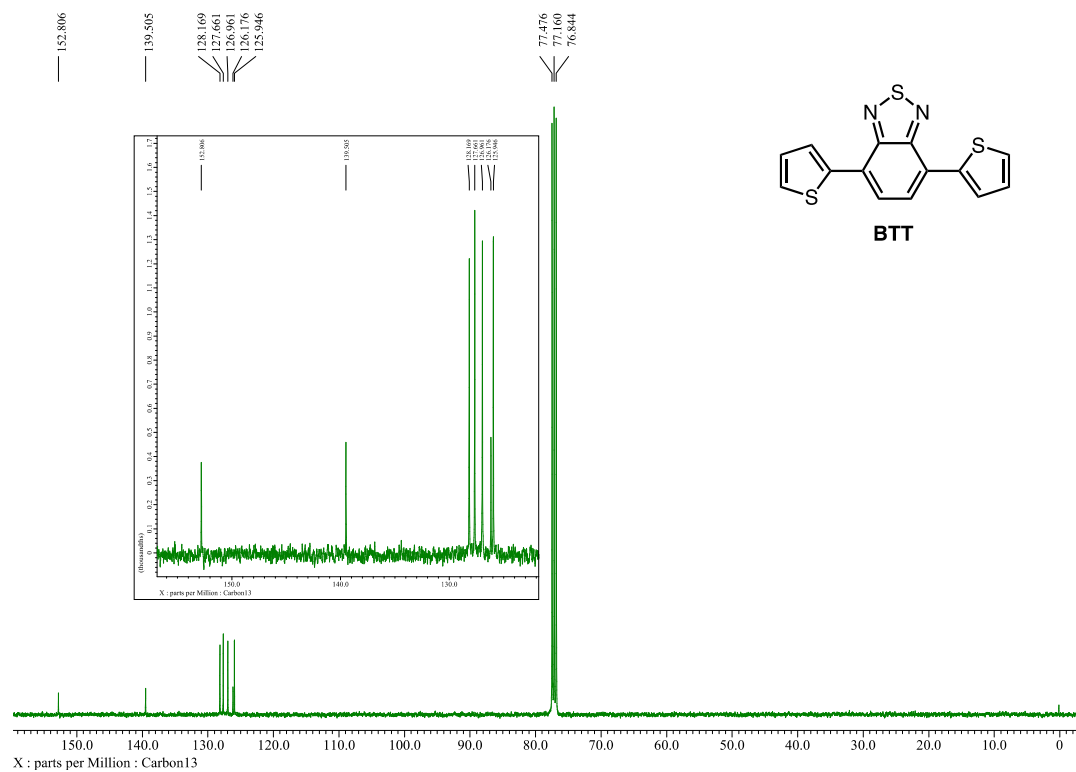

**Figure S5.** <sup>13</sup>C NMR spectrum of BTT in CDCl<sub>3</sub>.

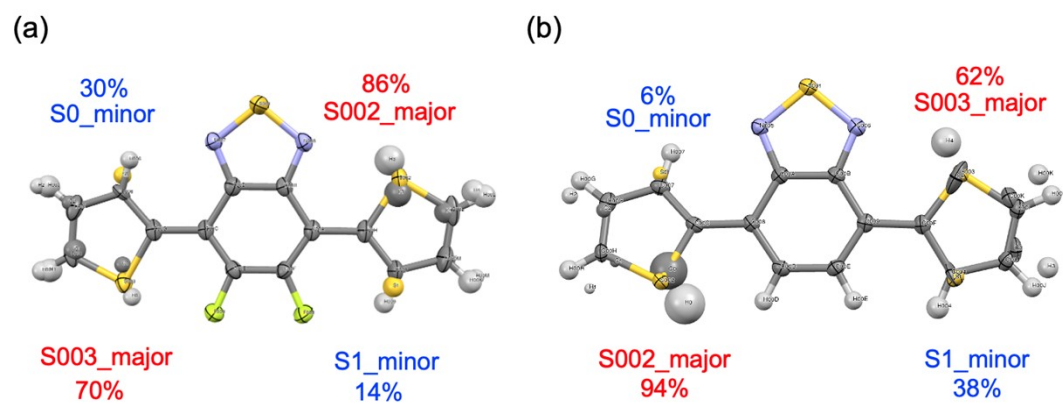

**Figure S8.** Molecular structure of (a) **BTFT** and (b) **BTT** (major and minor part of disorder assembly shown).

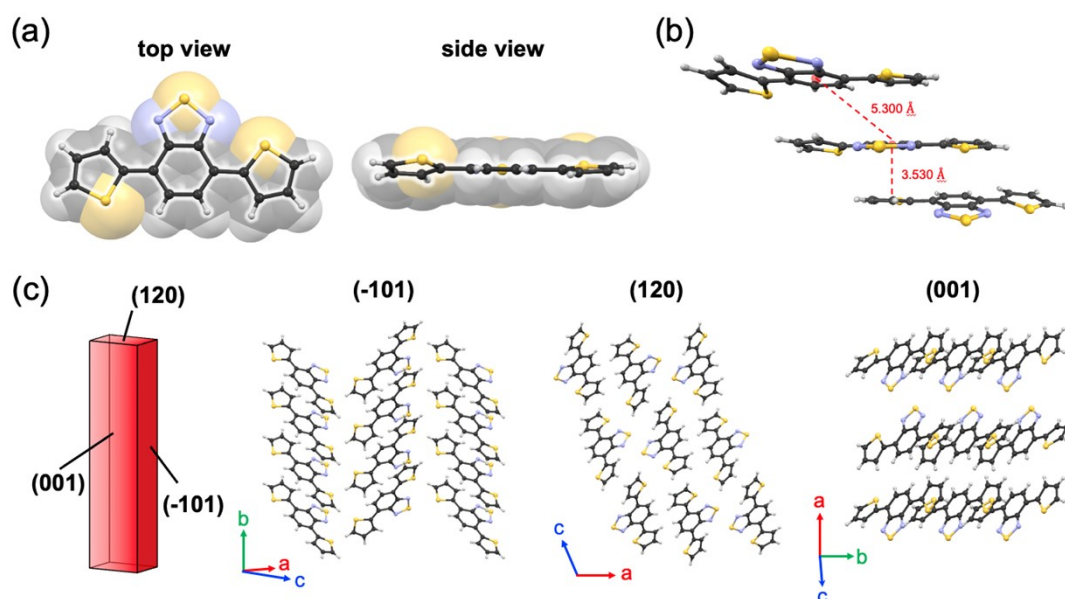

**Figure S9.** (a) Molecular structure (top and side views, respectively) of **BTT** in the crystal. (b) Slip-stacked structure, *J*-aggregate, of **BTT** in the crystal. (c) 3D crystal structure of the crystal **BTT**.

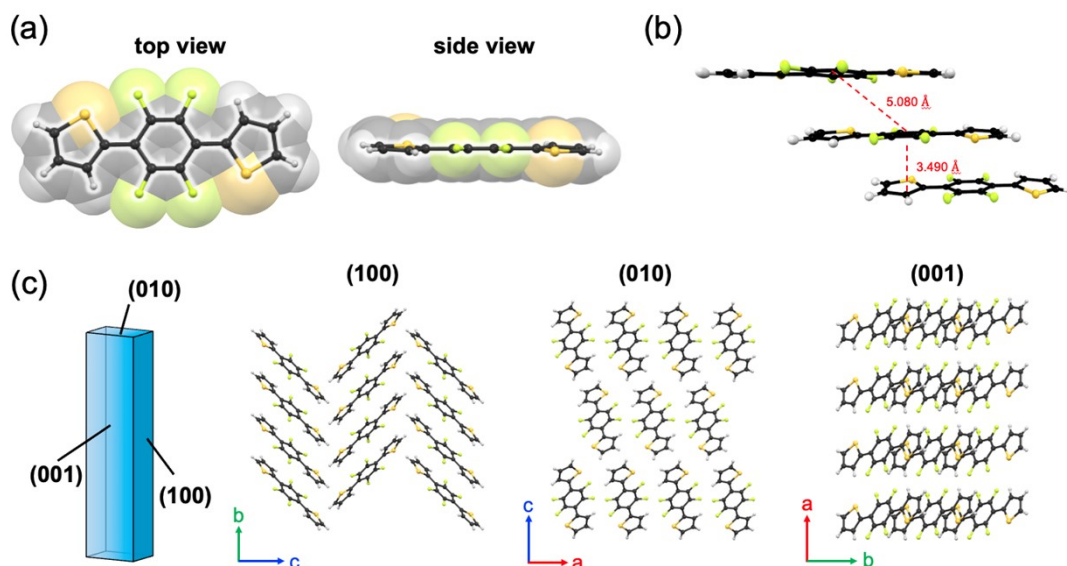

**Figure S10.** (a) Molecular structure (top and side views, respectively) of **BTFB** in the crystal. (b) Slip-stacked structure, *J*-aggregate, of **BTFB** in the crystal. (c) 3D crystal structure of the crystal **BTFB**.

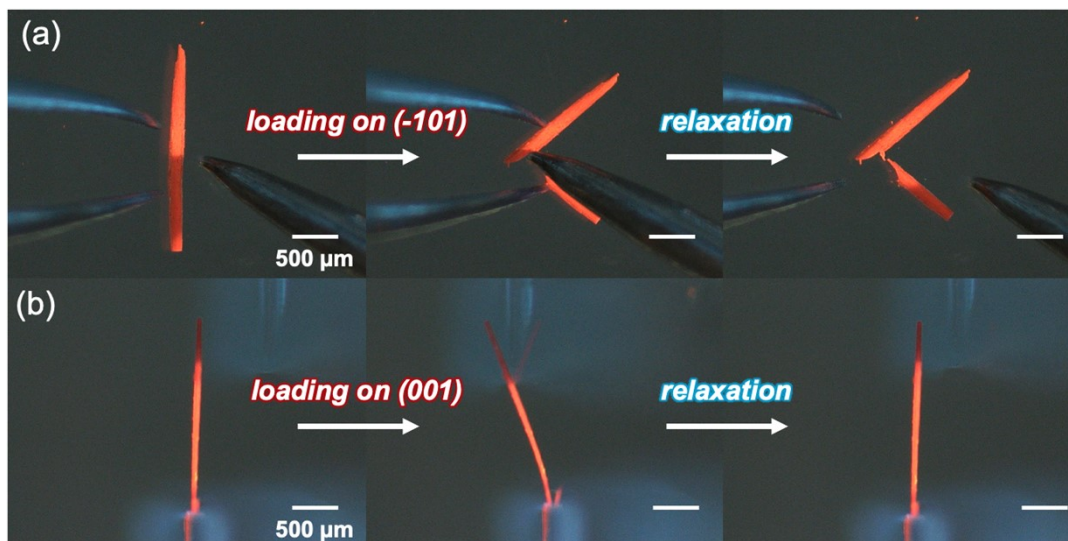

**Figure S11.** Mechanical deformation of **BTT** crystal. (a) Applied stress in the loading on (-101) face. (b) Applied stress in the loading on (001) face.

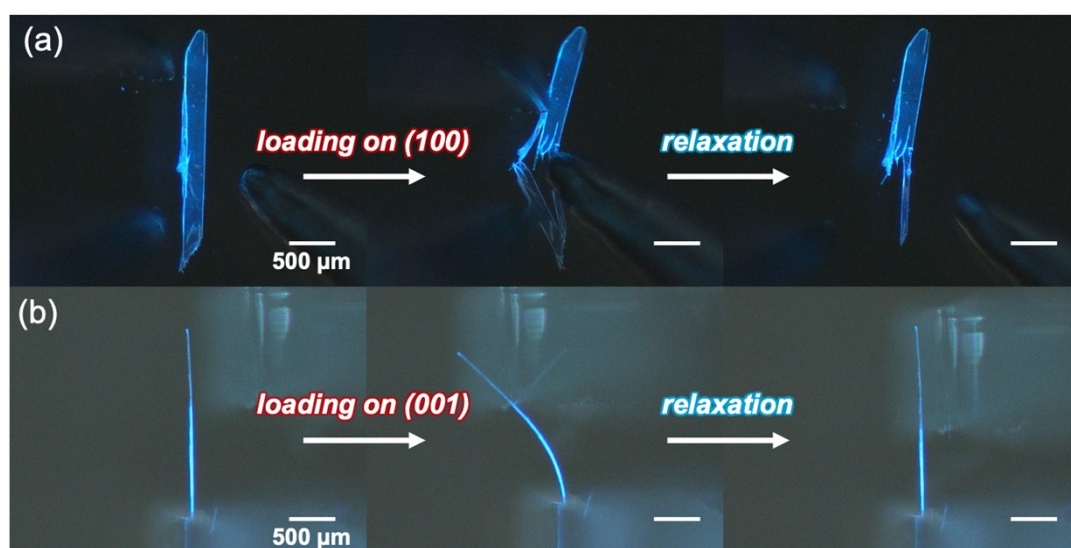

**Figure S12.** Mechanical deformation of **BTfB** crystal. (a) Applied stress in the loading on (100) face. (b) Applied stress in the loading on (001) face.

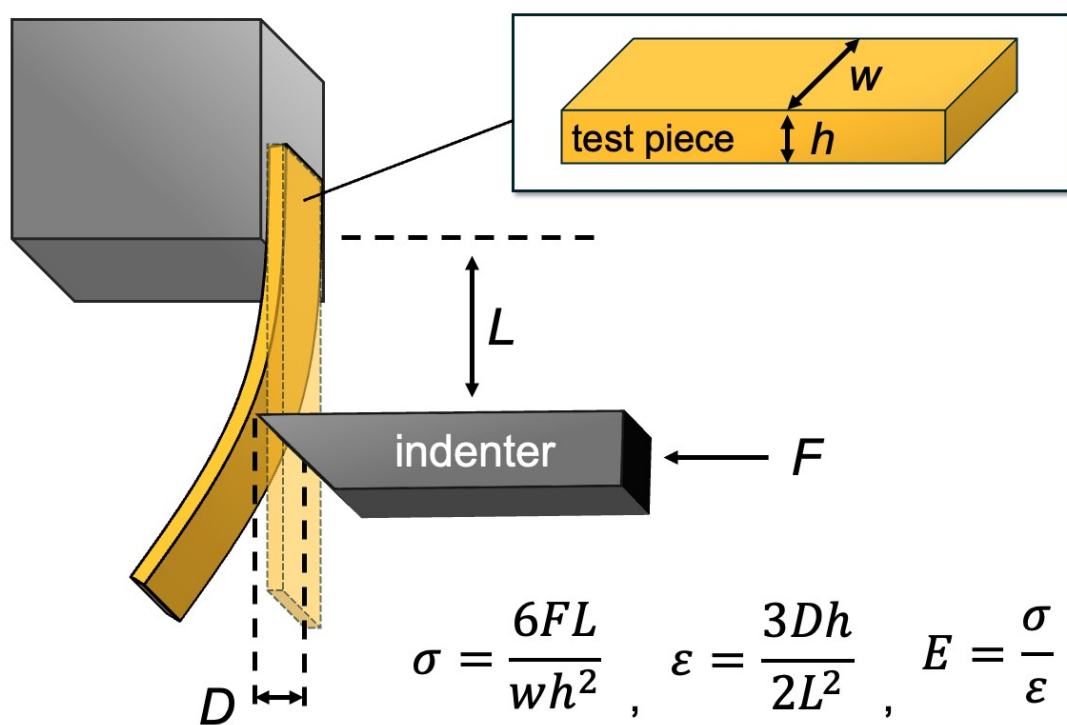

**Figure S13.** Schematic illustration of the cantilever test.

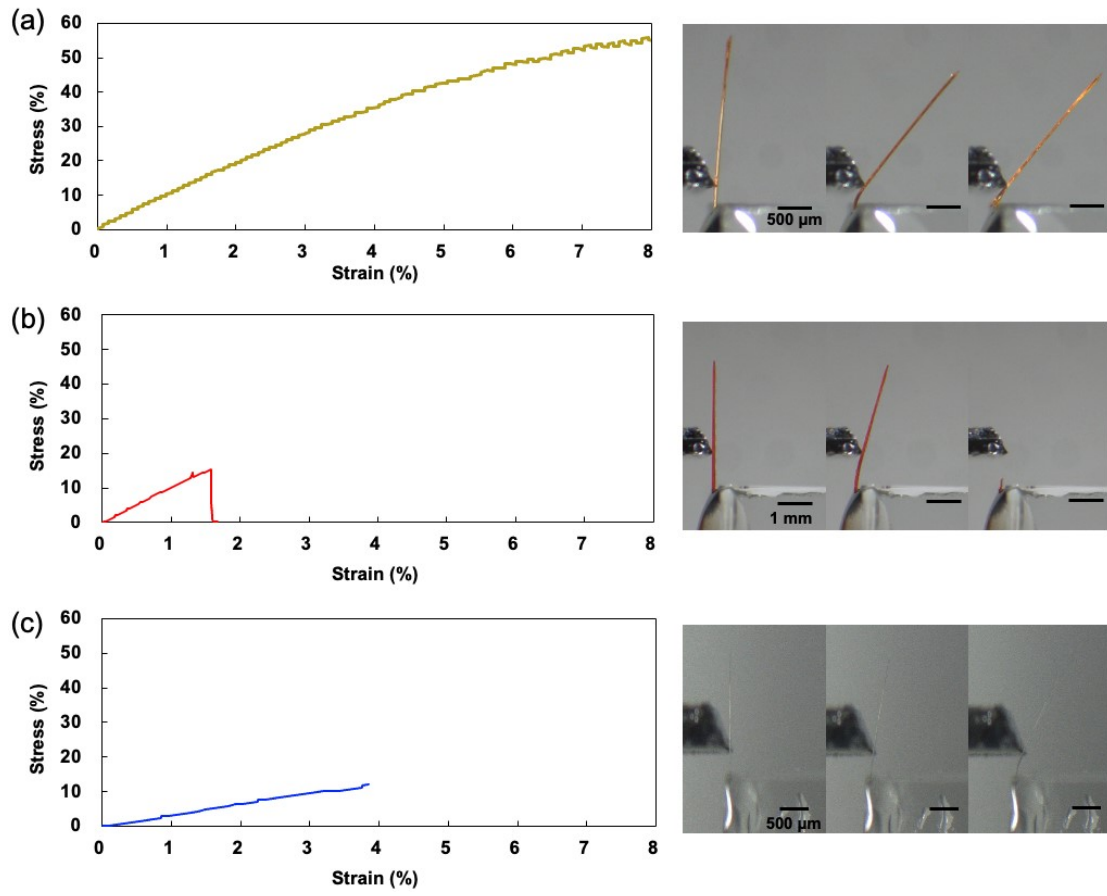

**Figure S14.** The F–S curves of (a) **BTFT**, (b) **BTT**, and (c) **BTFB** crystals along the  $c$ -axis.

**Table S1.** Indentation test on the  $c$ -axis of **BTFT**, **BTT**, **BTFB** crystals, measured young's modulus ( $E$ ) and elastic limit ( $S_{\text{lim}}$ )

|             | $E$ (GPa)         | $S_{\text{lim}}$ (%) |
|-------------|-------------------|----------------------|
| <b>BTFT</b> | $1.168 \pm 0.362$ | $4.29 \pm 1.41$      |
| <b>BTT</b>  | $0.757 \pm 0.683$ | $1.54 \pm 0.37$      |
| <b>BTFB</b> | $0.306 \pm 0.031$ | $3.00 \pm 0.21$      |



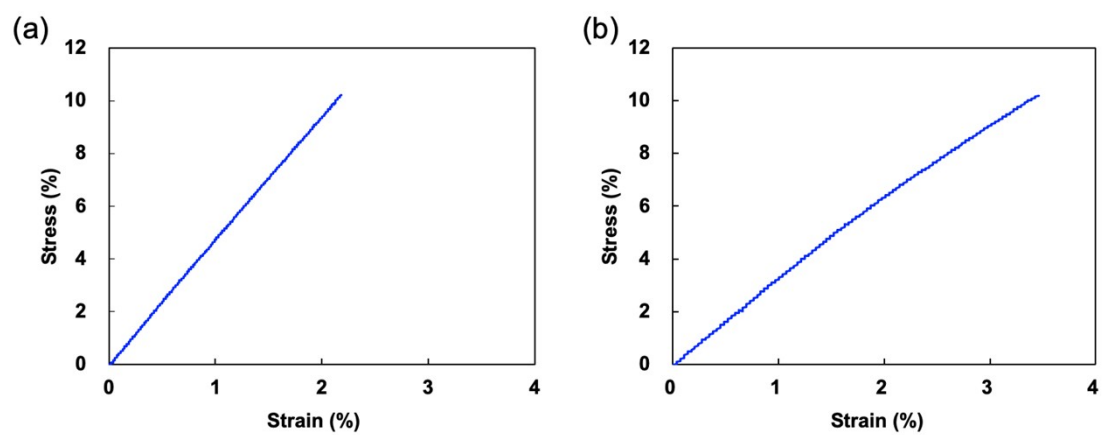

**Figure S15.** The F–S curves of (a) **PET** and (b) **PS** resin.

**Table S2.** Indentation test of **PET** and **PS** resin, measured young's modulus ( $E$ ) and elastic limit ( $S_{\text{lim}}$ )

|            | $E$ (GPa)         | $S_{\text{lim}}$ (%) |
|------------|-------------------|----------------------|
| <b>PET</b> | $0.572 \pm 0.106$ | —                    |
| <b>PS</b>  | $0.349 \pm 0.036$ | —                    |

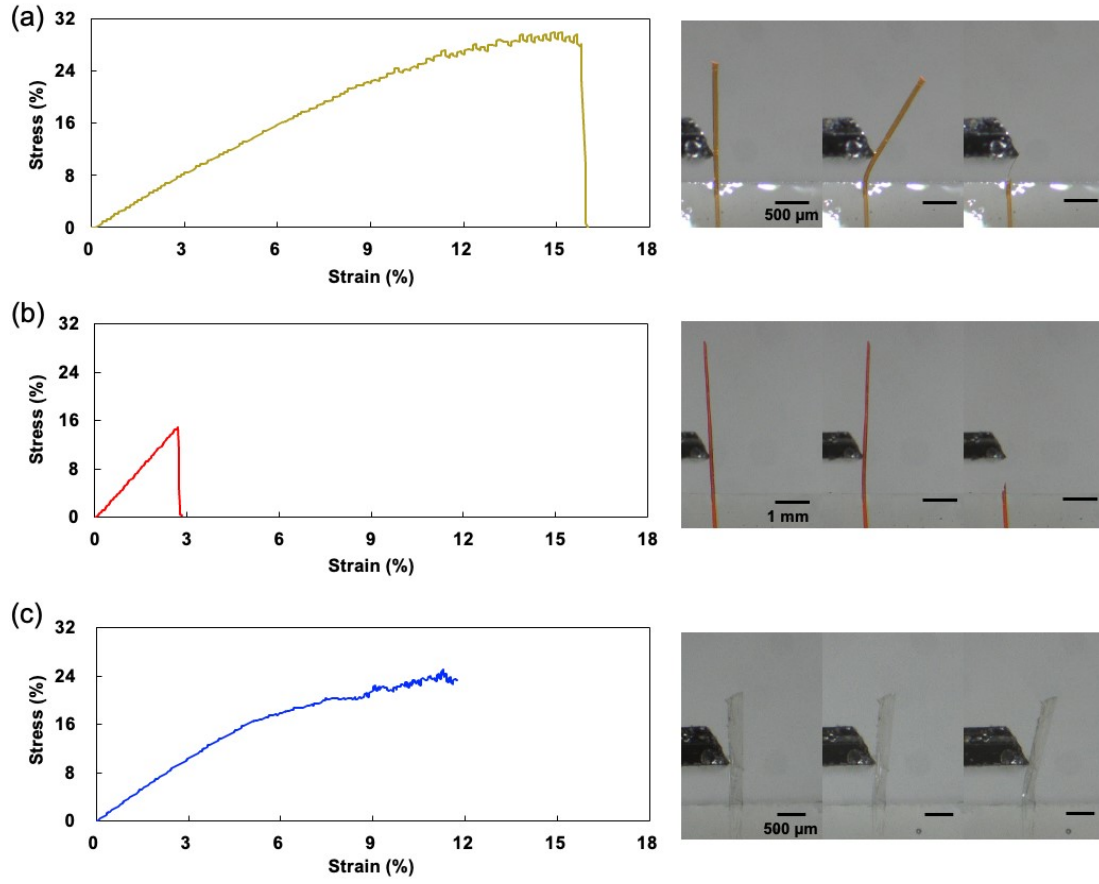

**Figure S16.** The F–S curves of (a) **BTFT**, (b) **BTT**, and (c) **BTFB** crystals along the  $a$ -axis.

**Table S3.** Indentation test on the  $a$ -axis of **BTFT**, **BTT**, **BTFB** crystals, measured young's modulus ( $E$ ) and elastic limit ( $S_{lim}$ )

|             | $E$ (GPa)         | $S_{lim}$ (%)   |
|-------------|-------------------|-----------------|
| <b>BTFT</b> | $0.406 \pm 0.119$ | $7.50 \pm 0.85$ |
| <b>BTT</b>  | $0.526 \pm 0.048$ | $2.40 \pm 0.40$ |
| <b>BTFB</b> | $0.374 \pm 0.076$ | $3.27 \pm 0.19$ |

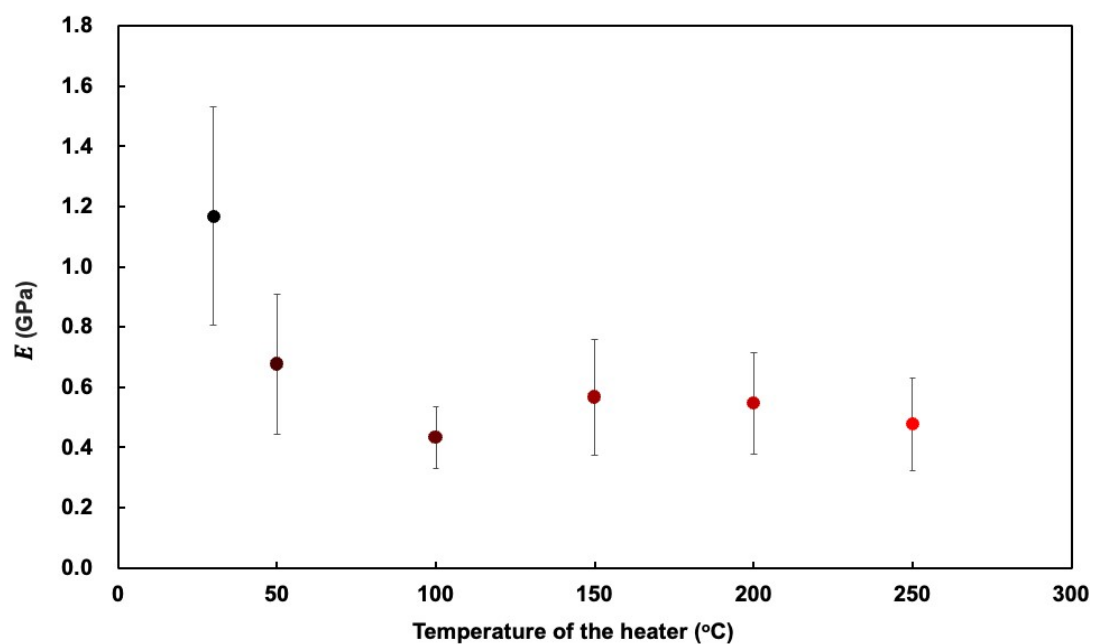

**Figure S17.** Temperature-dependance of Young's modulus for **BTFT** crystals from 30°C to 250°C.

**Table S4.** Temperature-dependance of Young's modulus for **BTFT** crystals

| Temp. (°C) | <i>E</i> (GPa) |
|------------|----------------|
| <b>30</b>  | 1.168 ± 0.362  |
| <b>50</b>  | 0.676 ± 0.232  |
| <b>100</b> | 0.433 ± 0.103  |
| <b>150</b> | 0.557 ± 0.191  |
| <b>200</b> | 0.547 ± 0.168  |
| <b>250</b> | 0.476 ± 0.154  |

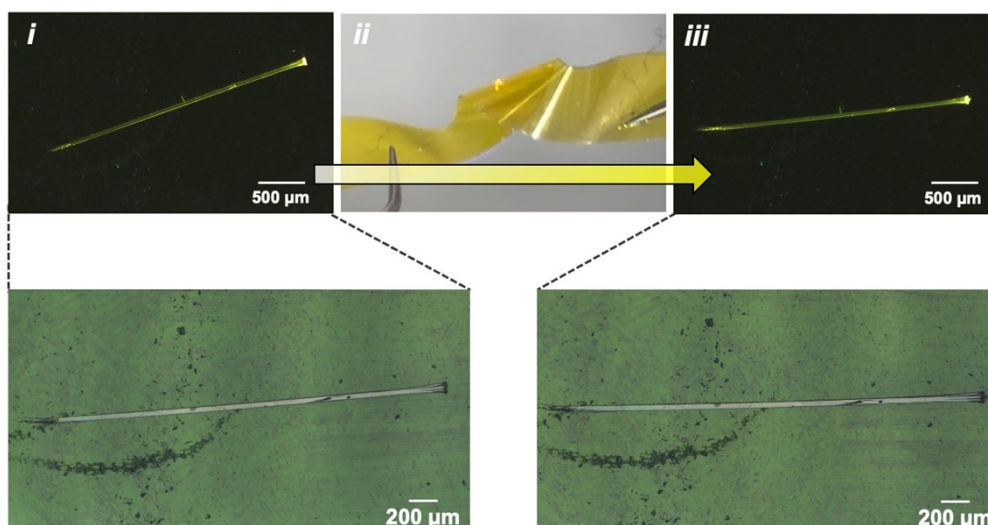

**Figure S18.** BTFT crystalline surfaces before and after applying mechanical stress to the hybrid material of crystalline **BTFT** and polyimide film. (i) Photograph of a crystal-polymer hybrid under UV irradiation. (ii) Mechanical deformation. (iii) State of a crystal under UV irradiation after mechanical stress.

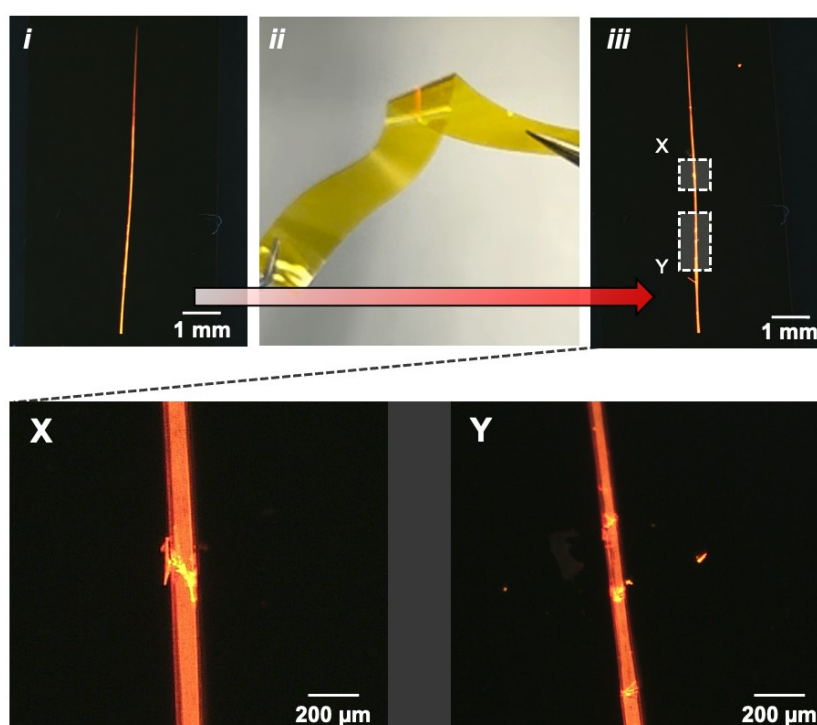

**Figure S19.** Crystalline **BTT** and polyimide film hybrid material and crystalline **BTT** surface after mechanical stress is applied. (i) Photograph of a crystal-polymer hybrid under UV irradiation. (ii)

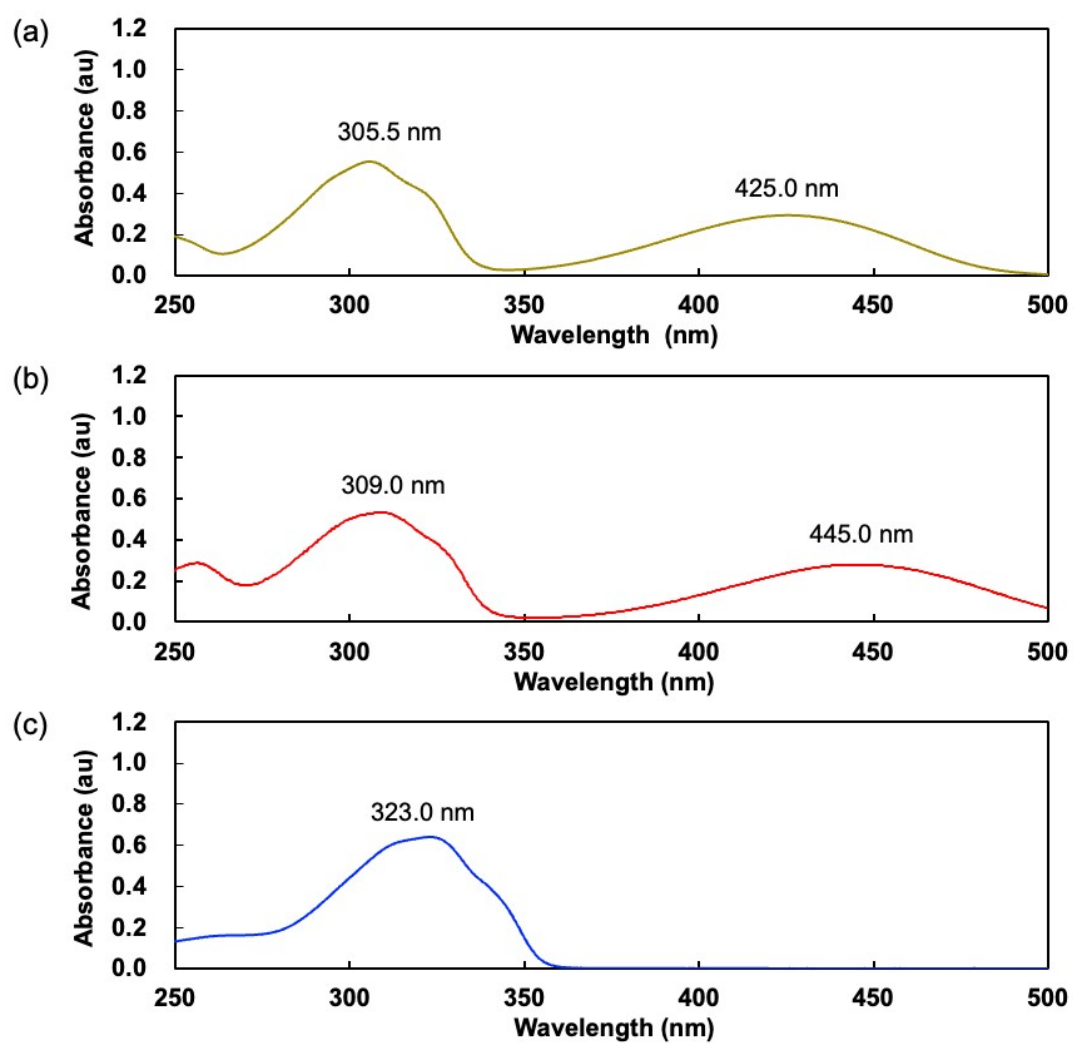

Figure S20. Absorption spectra of (a) **BTFT**, (b) **BTT** and (c) **BTFB** in  $\text{CH}_2\text{Cl}_2$ .

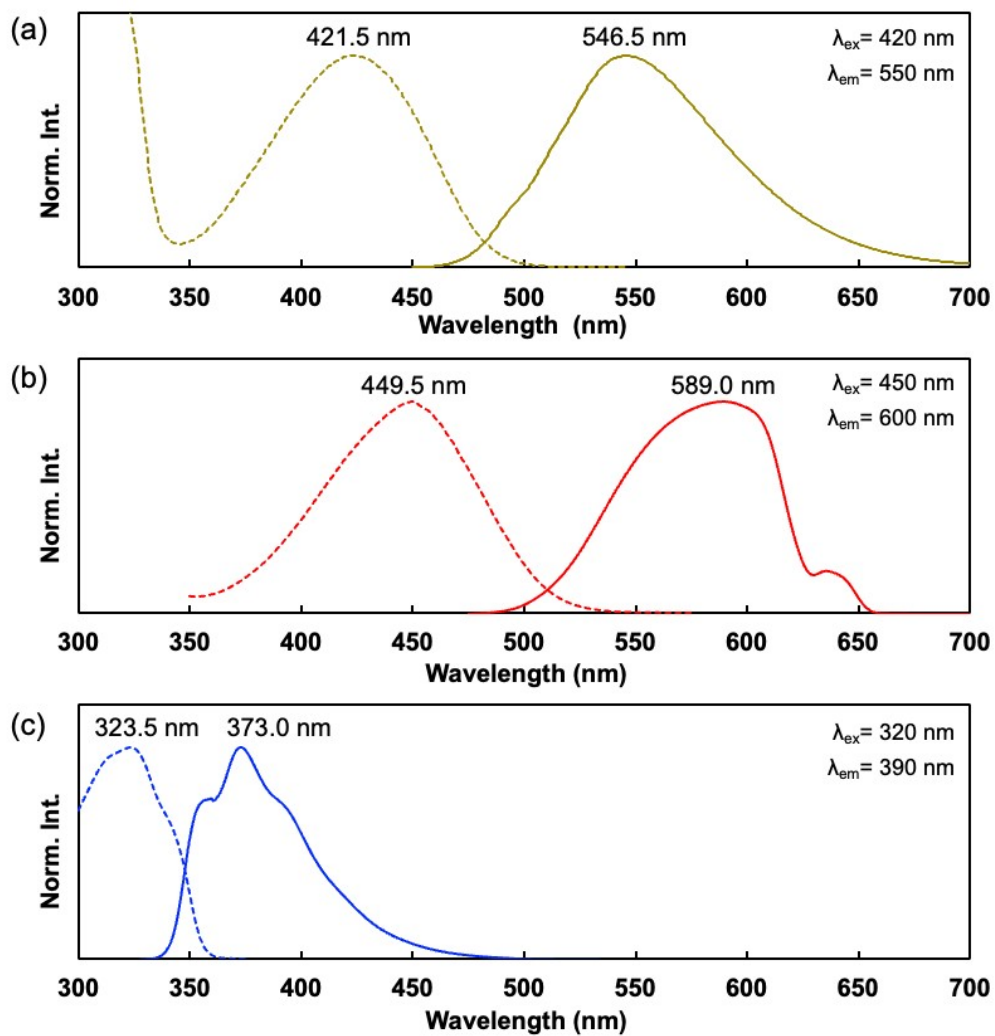

**Figure S19.** PL (–) and excitation (---) spectra of (a) **BTFT**, (b) **BTT** and (c) **BTFB** in  $\text{CH}_2\text{Cl}_2$ .

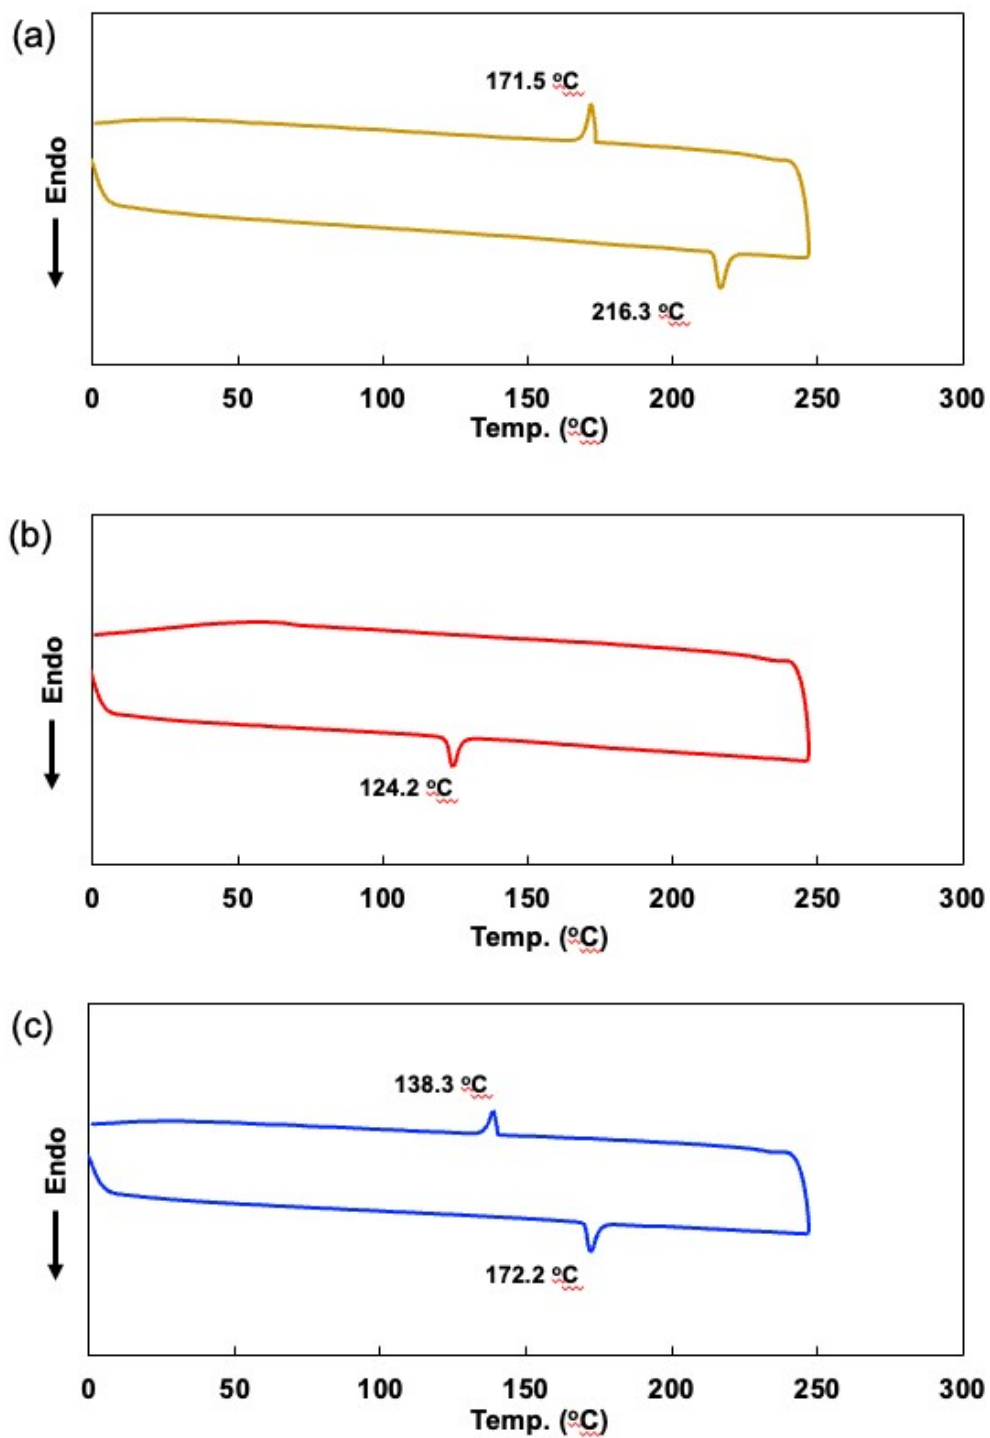

**Figure S22.** DSC analysis of (a) BTFT, (b) BTT, and (c) BTFB crystals.

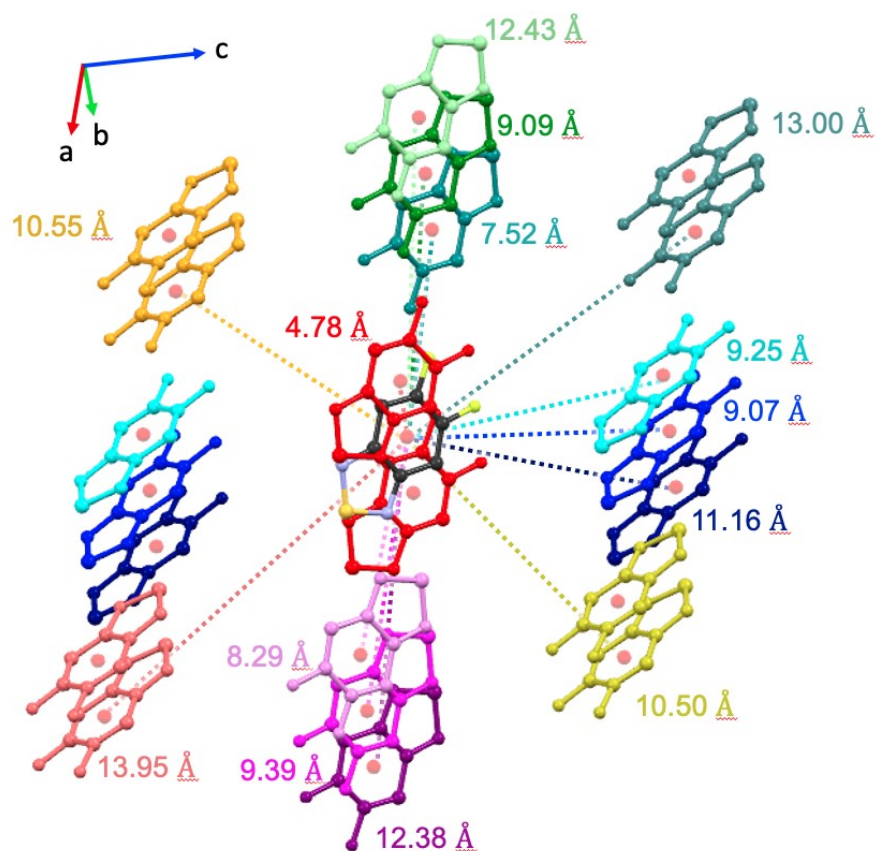

**Figure S23.** Crystal structure and center-to-center distance between nearby molecules of **BTFT** crystals.



**Table S5.** Transfer integral calculation results **BTFT** crystals

| Center-to-center distance (Å) | Transfer integral       |                             |
|-------------------------------|-------------------------|-----------------------------|
|                               | $t_{\text{hole}}$ (meV) | $t_{\text{electron}}$ (meV) |
| 4.78                          | 52.25                   | 53.20                       |
| 7.52                          | 1.22                    | 1.50                        |
| 8.29                          | 0.81                    | 61.63                       |
| 9.07                          | 13.06                   | 14.15                       |
| 9.09                          | 2.31                    | 1.50                        |
| 9.25                          | 57.69                   | 52.52                       |
| 9.39                          | 1.22                    | 21.09                       |
| 10.50                         | 61.09                   | 47.08                       |
| 10.55                         | 78.23                   | 61.36                       |
| 11.16                         | 15.65                   | 34.01                       |
| 12.38                         | 0.27                    | 0.68                        |
| 12.43                         | 0.54                    | 0.68                        |
| 13.00                         | 1.36                    | 0.41                        |
| 13.95                         | 1.36                    | 2.72                        |

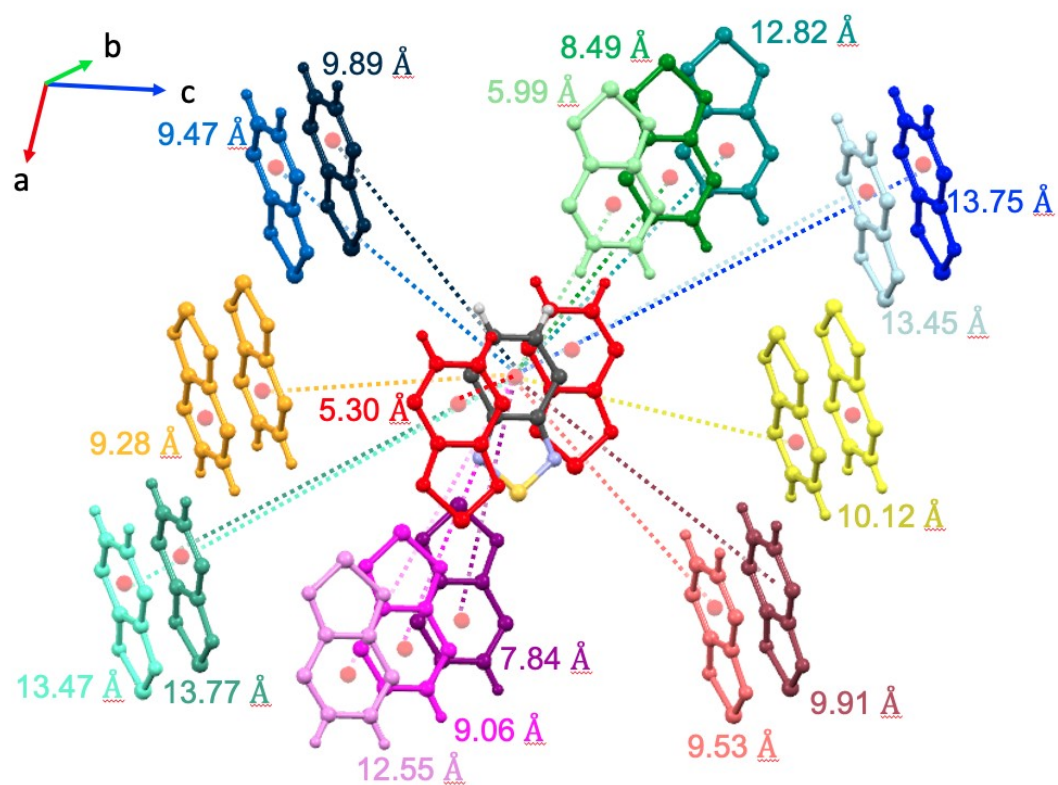

**Figure S24.** Crystal structure and center-to-center distance between nearby molecules of **BTT** crystals.

**Table S6.** Transfer integral calculation results **BTT** crystals

| Center-to-center distance (Å) | Transfer integral       |                             |
|-------------------------------|-------------------------|-----------------------------|
|                               | $t_{\text{hole}}$ (meV) | $t_{\text{electron}}$ (meV) |
| 5.30                          | 47.89                   | 40.41                       |
| 5.99                          | 19.32                   | 48.57                       |
| 7.84                          | 3.95                    | 47.08                       |
| 8.49                          | 3.27                    | 5.85                        |
| 9.06                          | 1.22                    | 41.77                       |
| 9.28                          | 89.53                   | 75.78                       |
| 9.47                          | 63.27                   | 62.45                       |
| 9.53                          | 63.27                   | 62.99                       |
| 9.89                          | 8.98                    | 5.71                        |
| 9.91                          | 8.44                    | 4.63                        |
| 10.12                         | 95.24                   | 66.67                       |
| 12.55                         | 3.81                    | 47.08                       |
| 12.82                         | 3.81                    | 47.08                       |
| 13.45                         | 13.33                   | 5.58                        |
| 13.47                         | 7.76                    | 6.80                        |
| 13.75                         | 19.32                   | 18.10                       |
| 13.77                         | 19.32                   | 17.42                       |

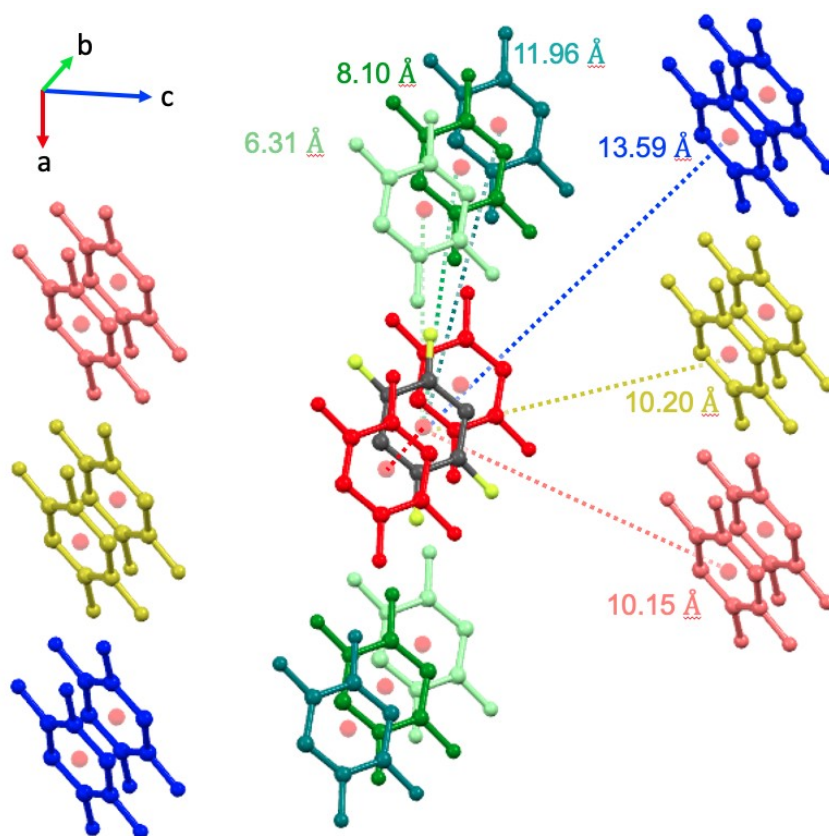

**Figure S25.** Crystal structure and center-to-center distance between nearby molecules of **BTFB** crystals.

**Table S7.** Transfer integral calculation results **BTfB** crystals

| Center-to-center distance (Å) | Transfer integral       |                             |
|-------------------------------|-------------------------|-----------------------------|
|                               | $t_{\text{hole}}$ (meV) | $t_{\text{electron}}$ (meV) |
| 5.08                          | 37.82                   | 89.66                       |
| 6.31                          | 5.03                    | 1.63                        |
| 8.10                          | 0.54                    | 0.54                        |
| 10.15                         | 52.10                   | 52.65                       |
| 10.20                         | 87.08                   | 82.99                       |
| 11.96                         | 0.14                    | 0.14                        |
| 13.59                         | 8.98                    | 7.35                        |
